# Supplementary material for: New series of honeycomb ordered oxides, Na3M2SbO6 (M(ii) = Mn, Fe, (Mn, Fe), (Mn, Co)): synthesis, structure and magnetic properties
Source: Royal Society of Chemistry journal article supplement (doi:10.1039/c9dt01194c), 2019-01-01
Supplement: c9dt01194c1.pdf [file c9dt01194c1.pdf]

### Electronic Supplementary Information (ESI)

New Series of Honeycomb Ordered Oxides,  $\text{Na}_3\text{M}_2\text{SbO}_6$  (M (II) = Mn, Fe, (Mn, Fe), (Mn,

Co)): Synthesis, Structure and Magnetic Properties†

Dileep Kumar Yadav, Aanchal Sethi, Shalu, and S. Uma\*

Materials Chemistry Group, Department of Chemistry

University of Delhi, Delhi-110007, INDIA

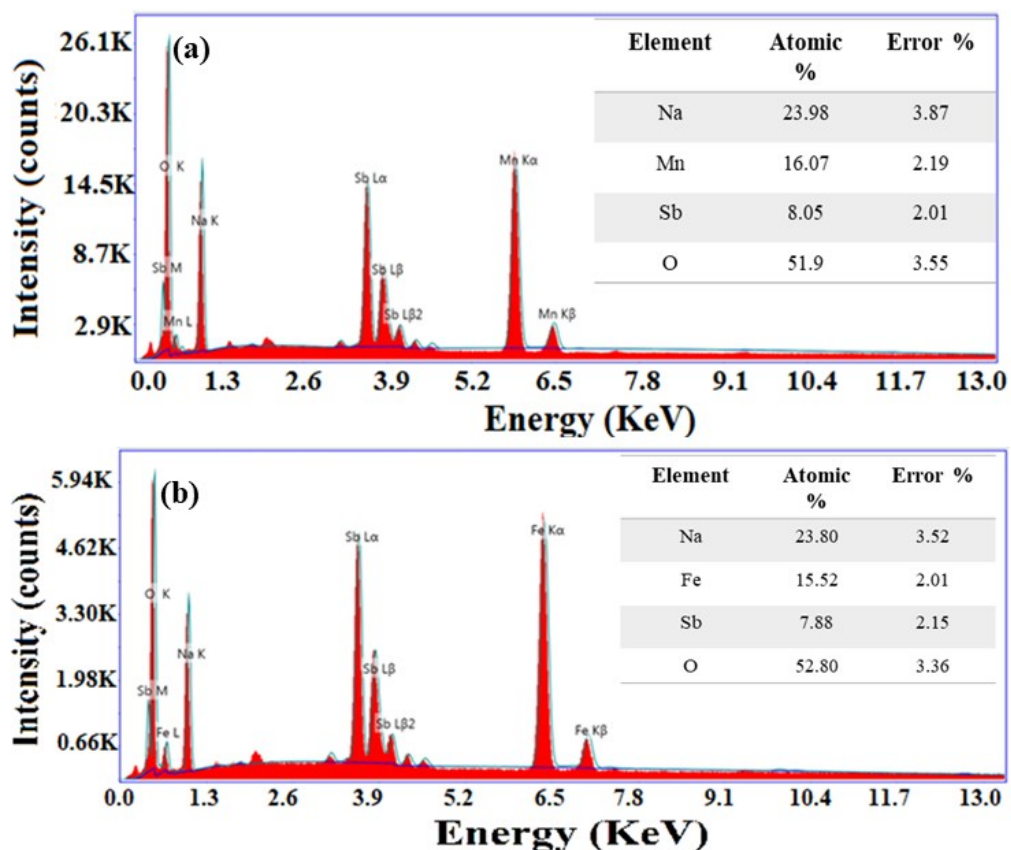

Figure S1. EDS spectra of polycrystalline (a)  $\text{Na}_3\text{Mn}_2\text{SbO}_6$  and (b)  $\text{Na}_3\text{Fe}_2\text{SbO}_6$ .

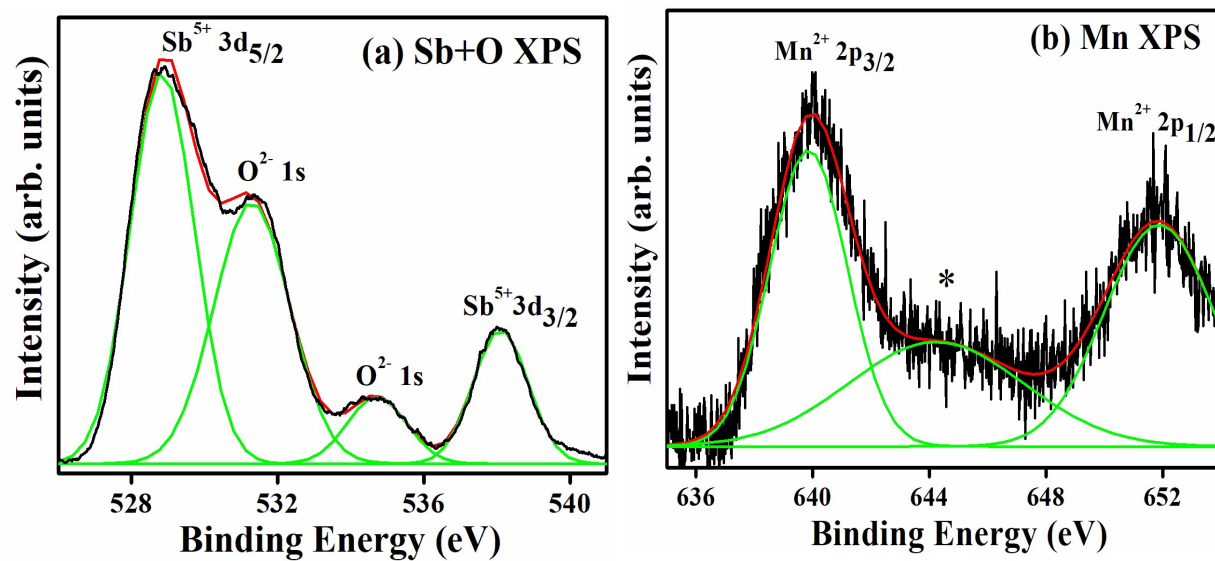

**Figure S2.** Core level X-ray photoelectron spectra of the (a) Sb 3d and O 1s and (b) Mn 2p peaks of  $\text{Na}_3\text{Mn}_2\text{SbO}_6$ .

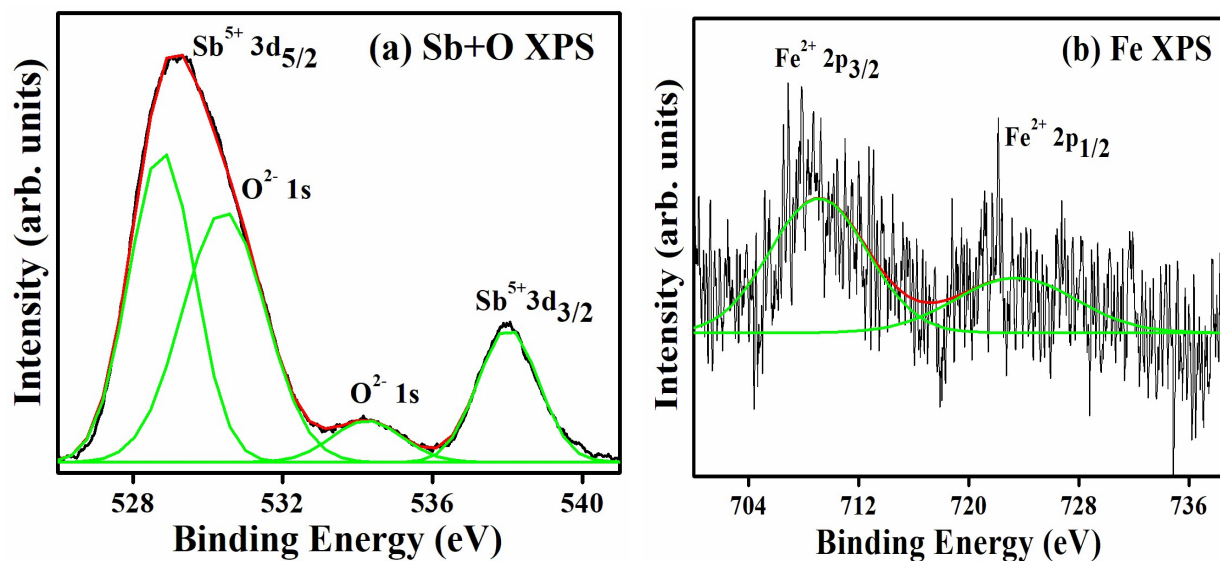

**Figure S3.** Core level X-ray photoelectron spectra of the (a) Sb 3d and O 1s and (b) Fe 2p peaks of  $\text{Na}_3\text{Fe}_2\text{SbO}_6$ .

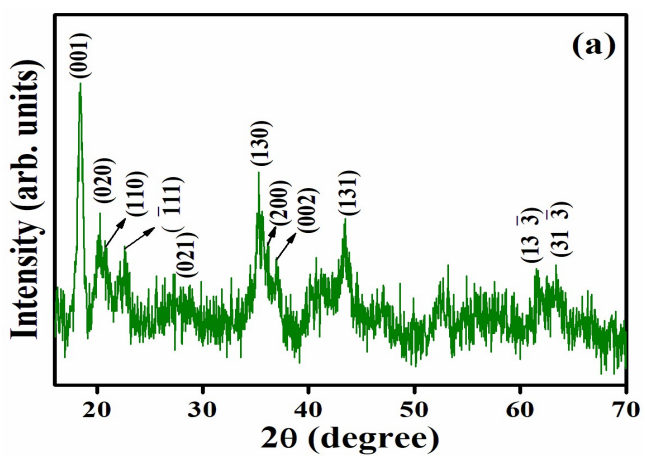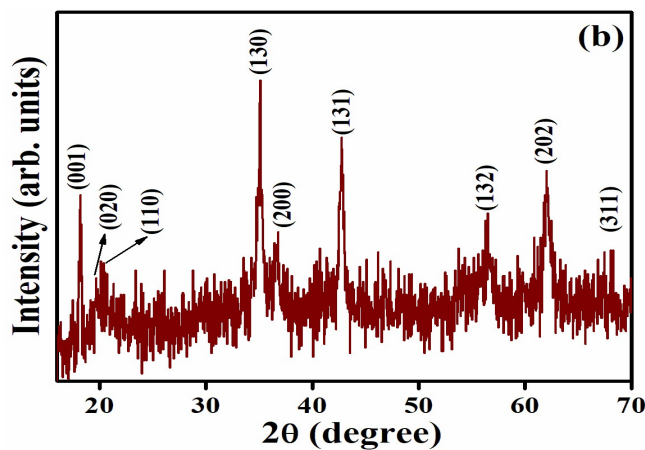

**Figure S4.** PXRD pattern along with Bragg reflections plot for Li<sup>+</sup> exchanged products of (a) Na<sub>3</sub>Mn<sub>2</sub>SbO<sub>6</sub> and (b) Na<sub>3</sub>Fe<sub>2</sub>SbO<sub>6</sub>.
